# Supplementary material for: Call 513-662-7000 For Service On Your Insurance
Source: MDPI journal article supplement (doi:10.3390/ijms24087420), 2009-01-01

# Original gel images

Figure 1B

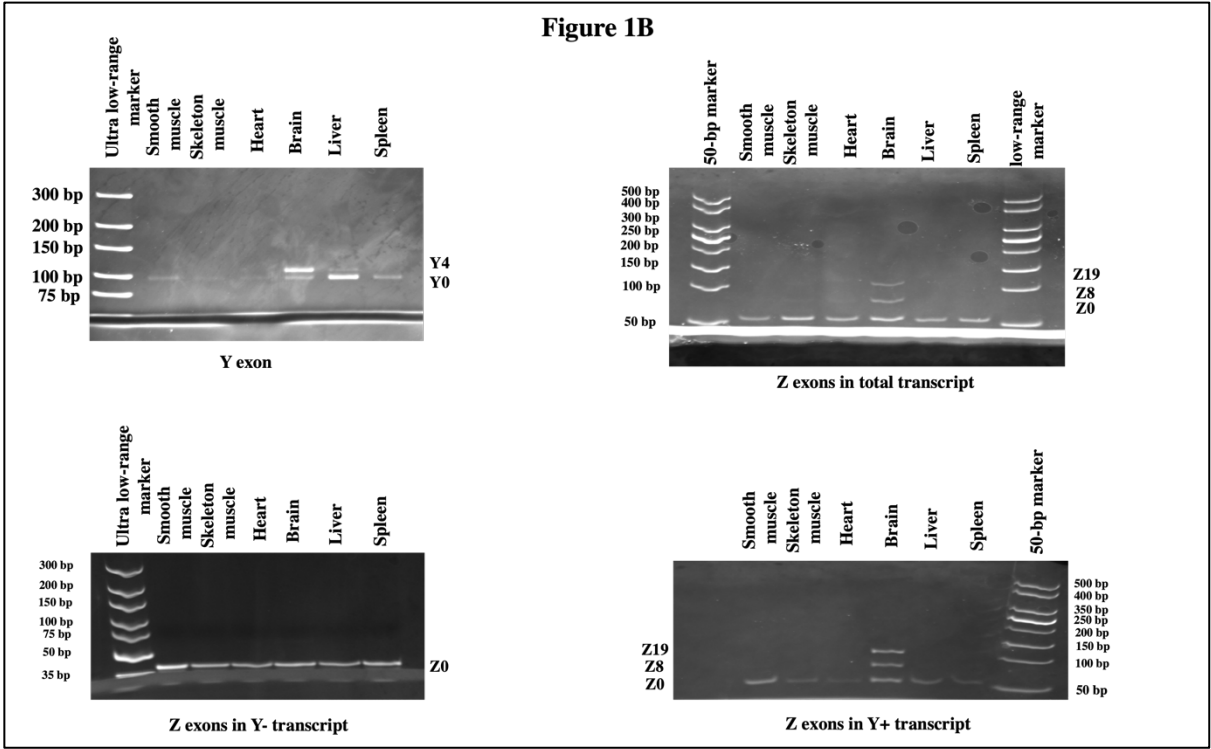

Figure 1C

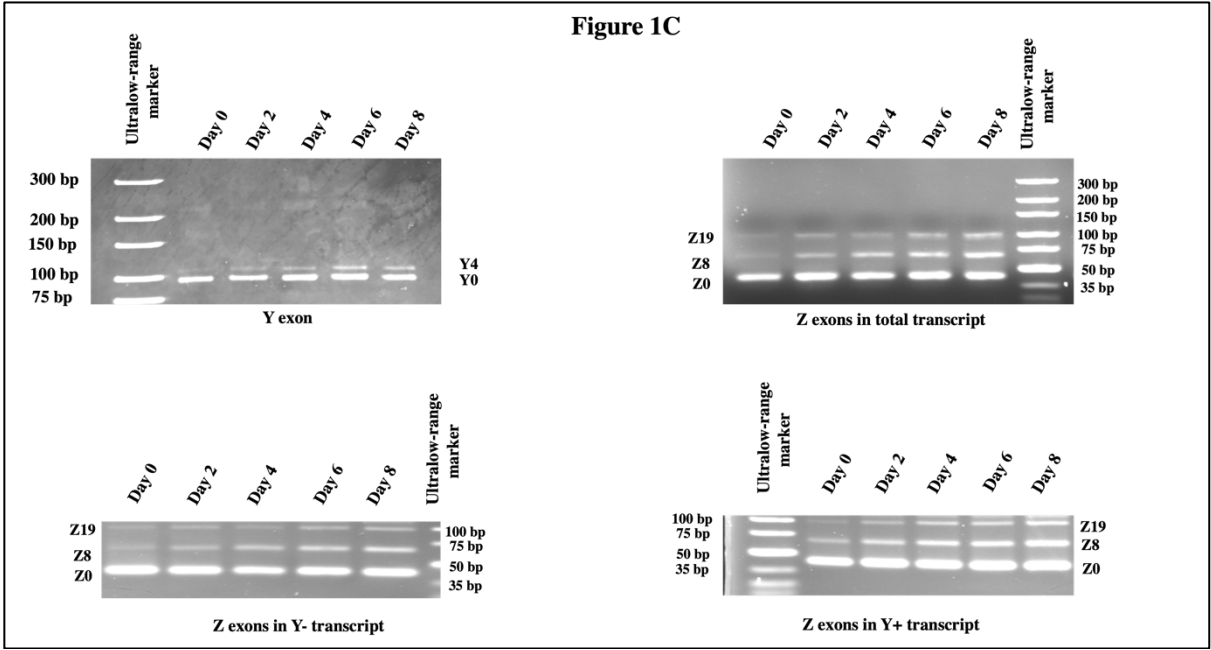

**Figure 2B**

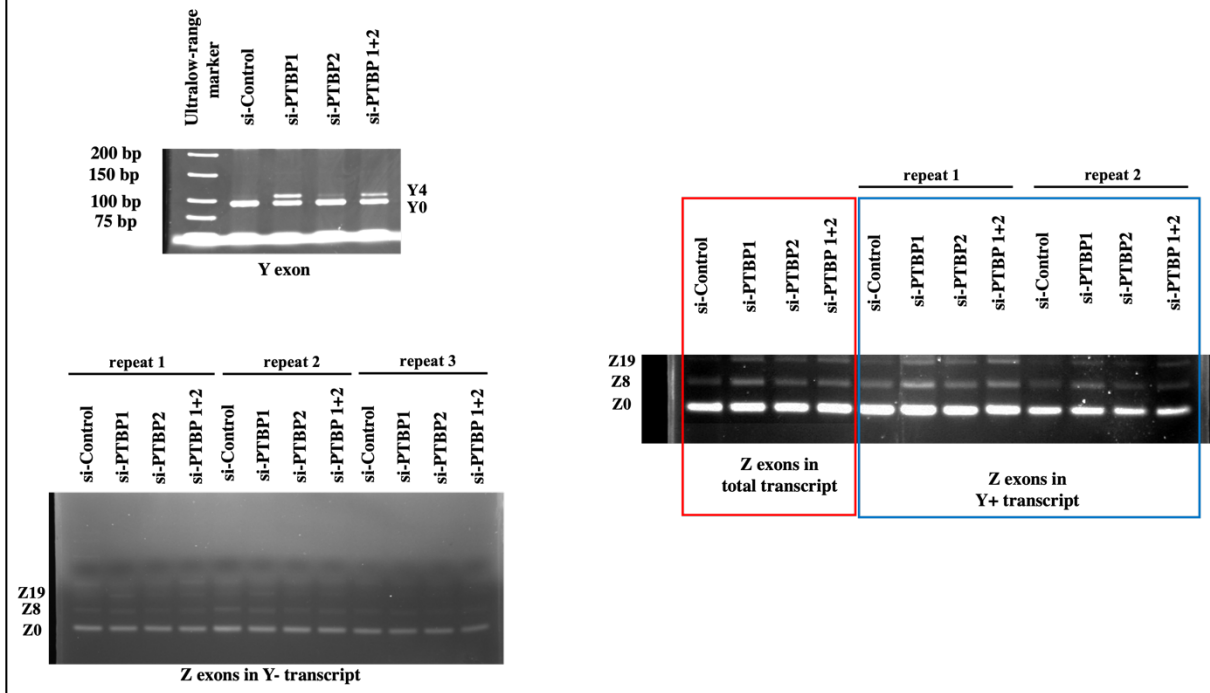

**Figure 3A**

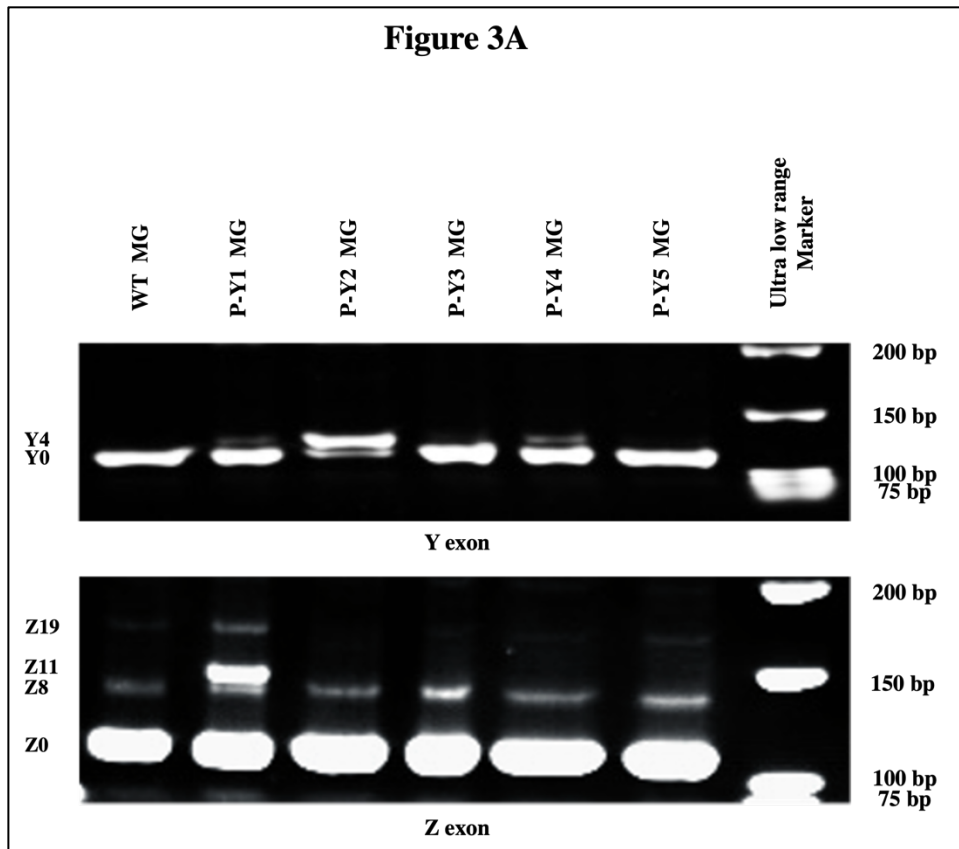

Figure 3D

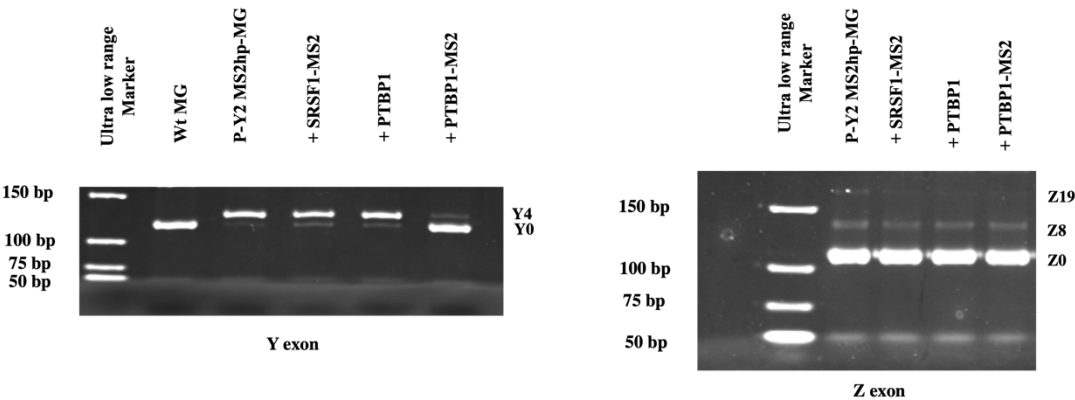

Figure 3G

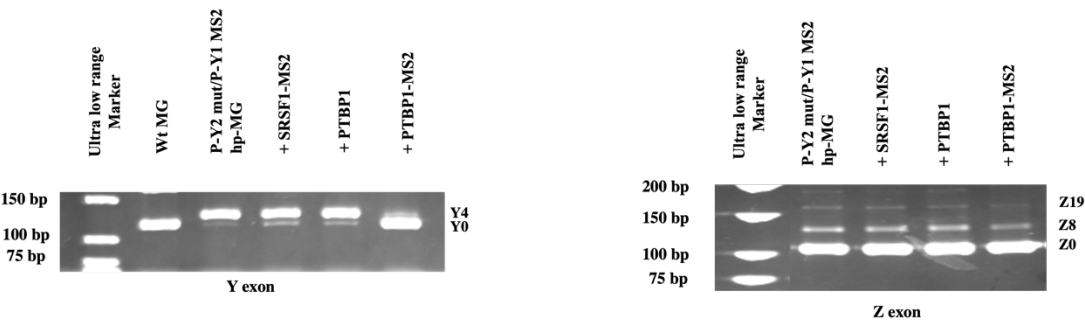

Figure 4A

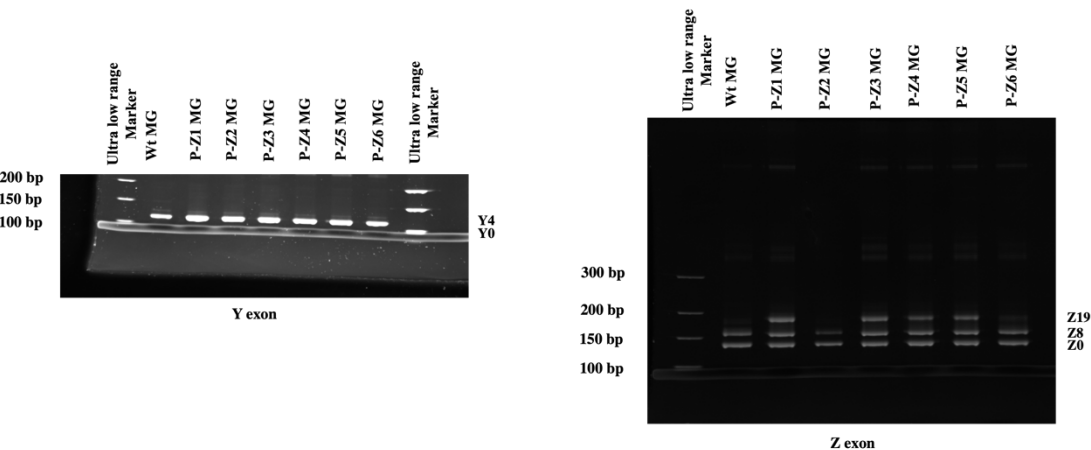

Figure 4D

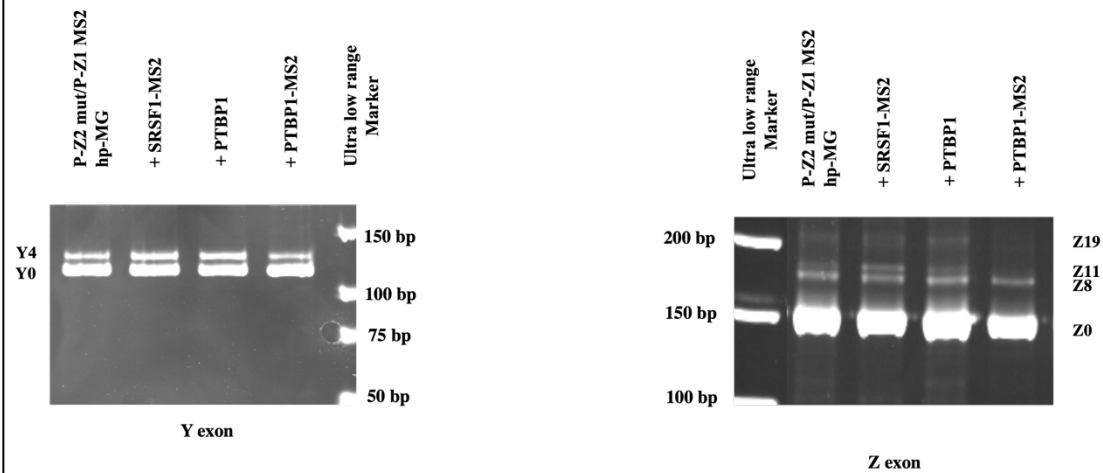

Figure 4G

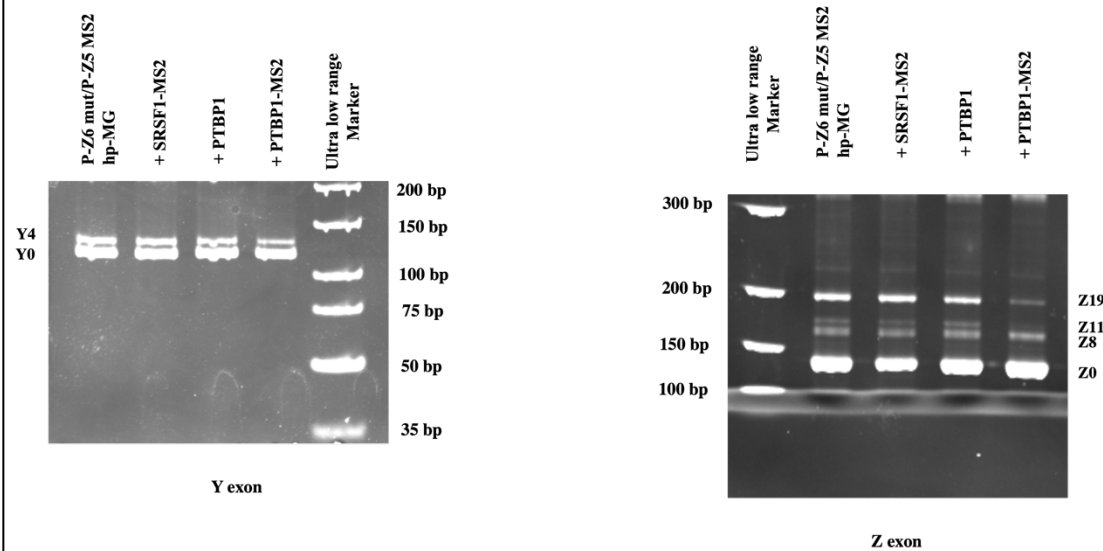

**Figure 5B**

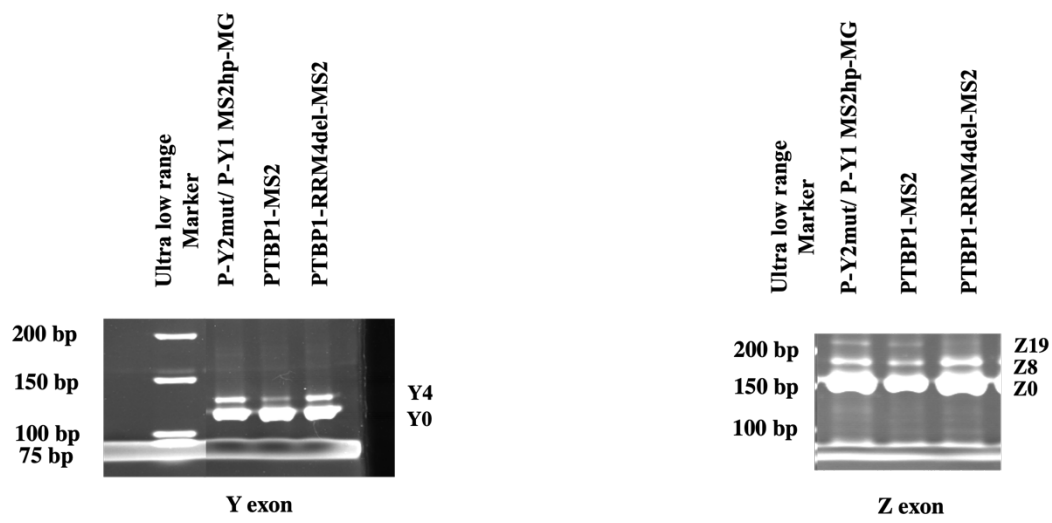

**Figure 5E**

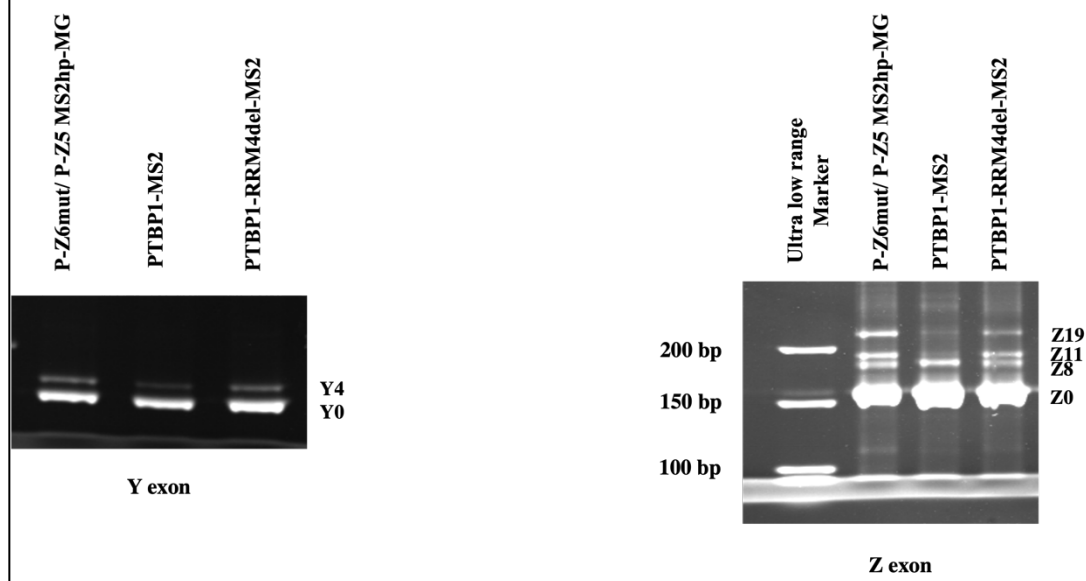

Supplementary Figure S4B

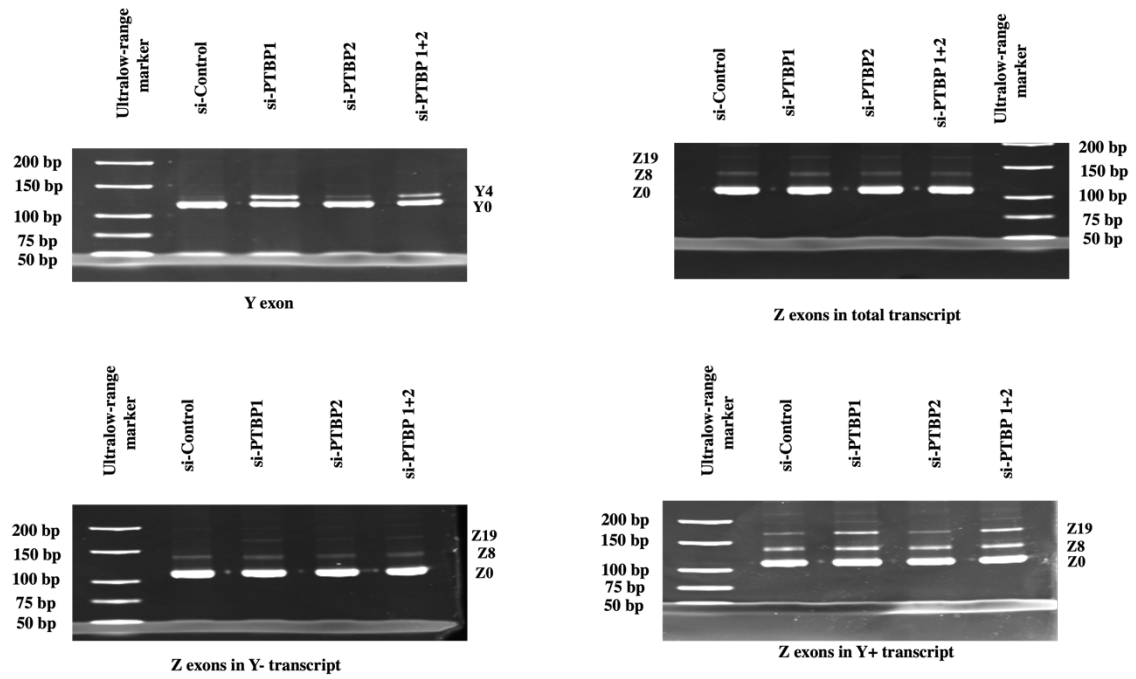

Supplementary Figure S5B

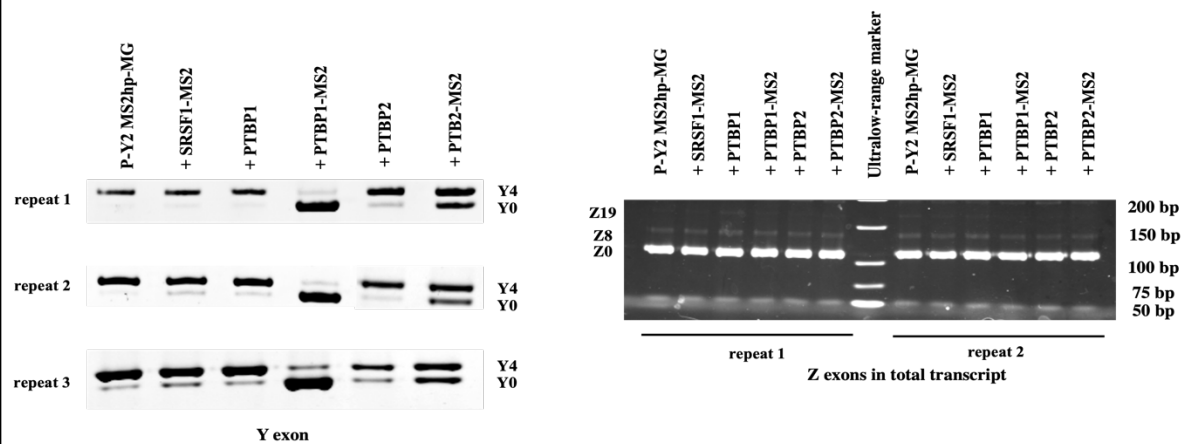

Supplementary Figure S5E

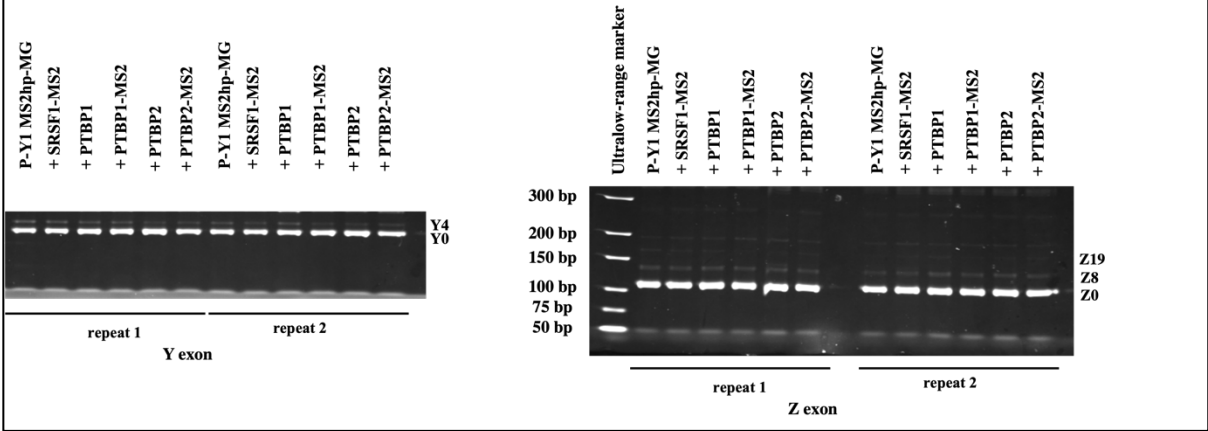

Supplementary Figure S5H

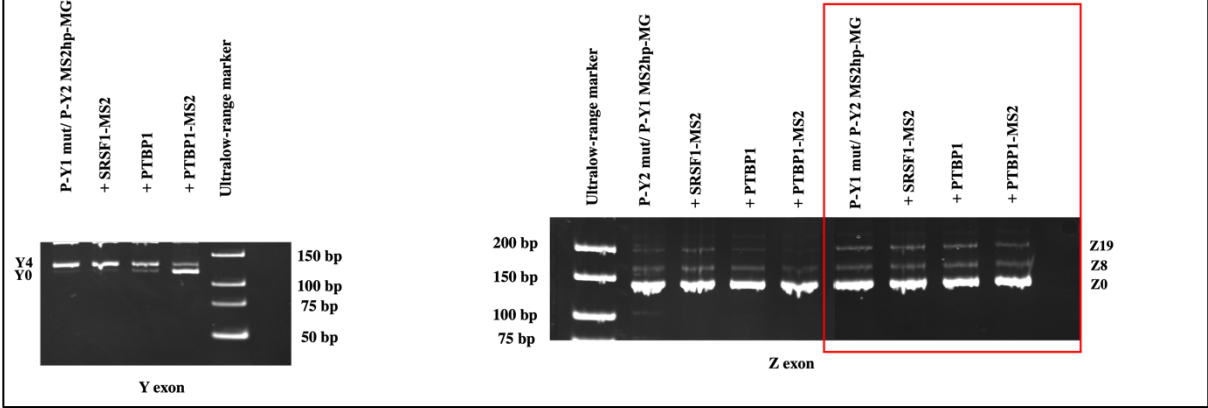

Supplementary Figure S6C

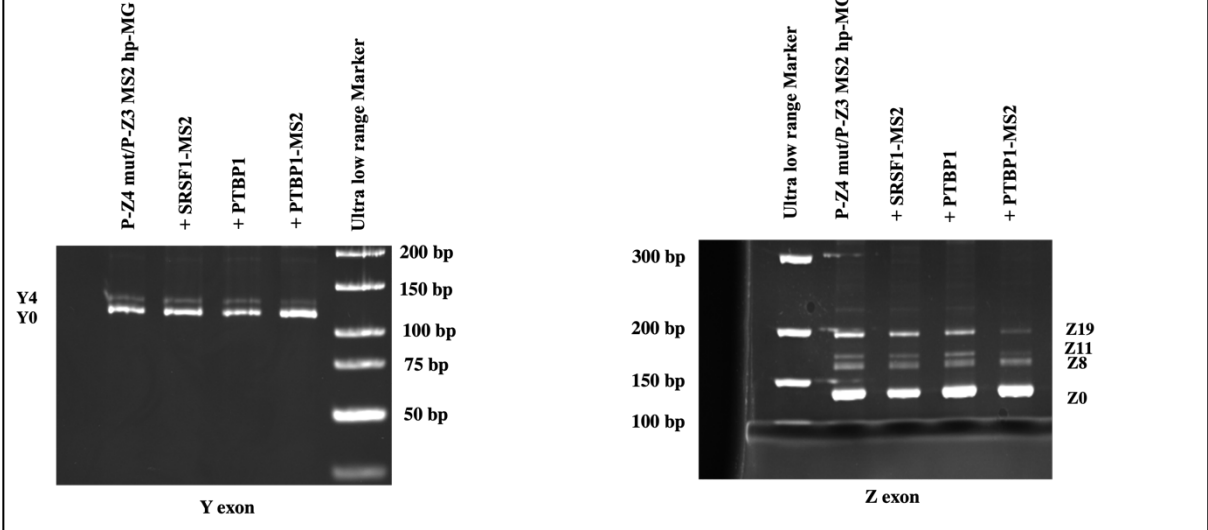

Supplementary Figure S7A

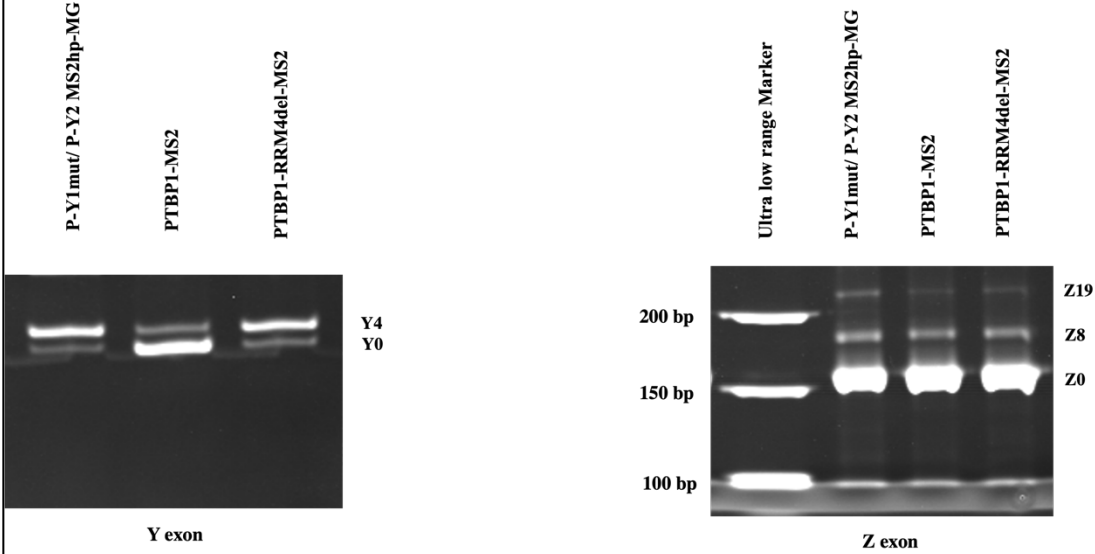

Supplementary Figure S7D

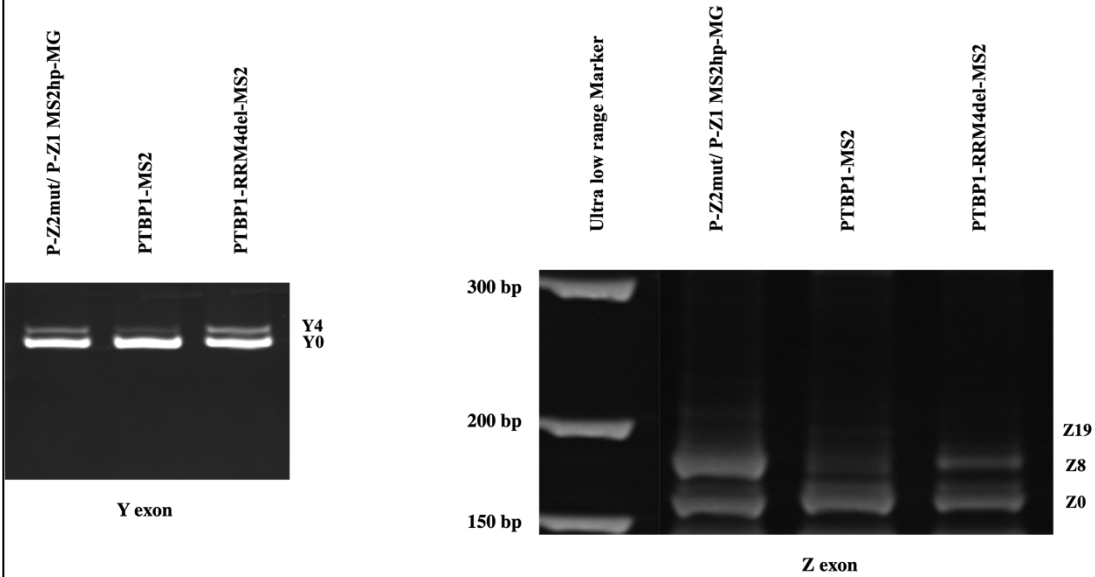



Supplementary Figure S7G

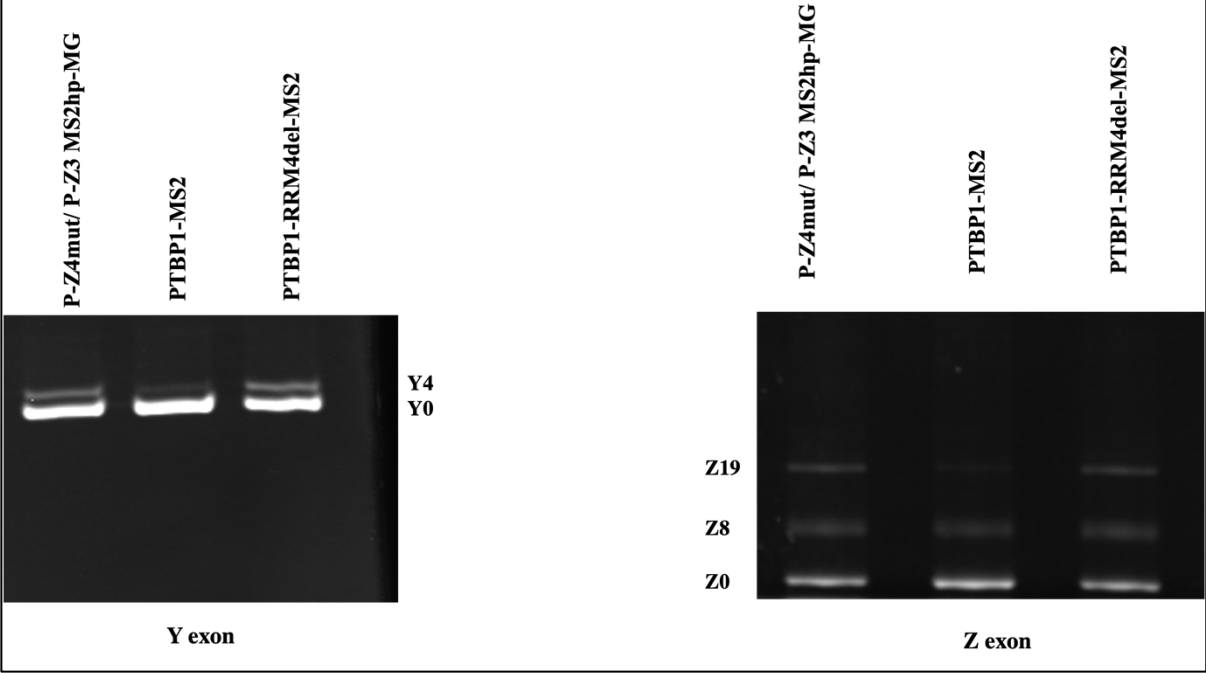

Original blots

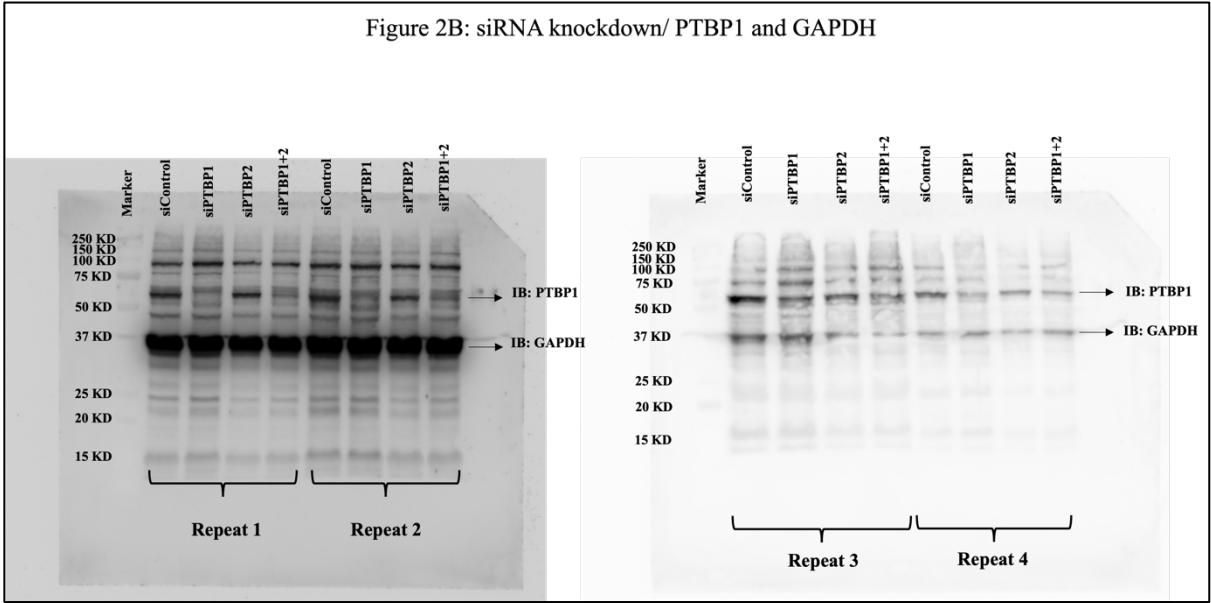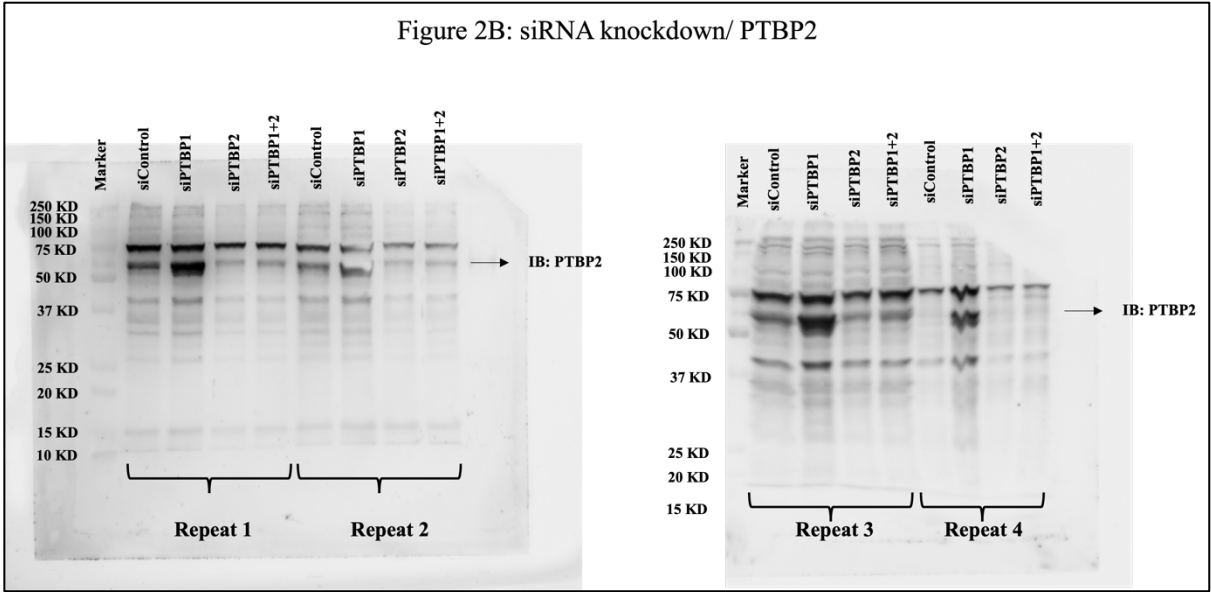

Supplementary Figure S2: neuronal cell (SH-SY5Y) differentiation/ PTBP1 and GAPDH

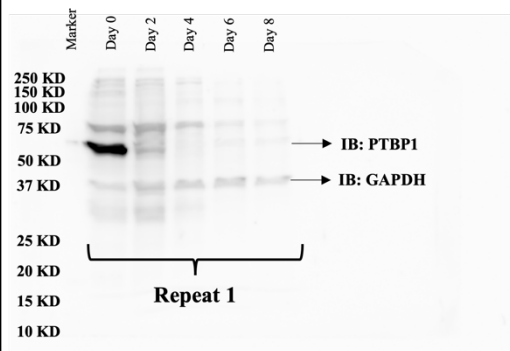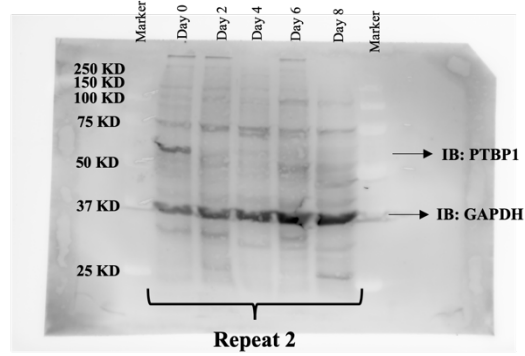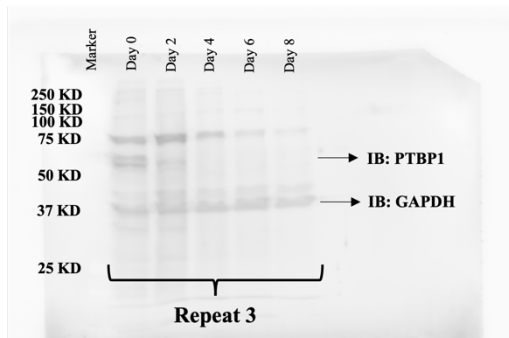

Supplementary Figure S2: neuronal cell (SH-SY5Y) differentiation/ PTBP2

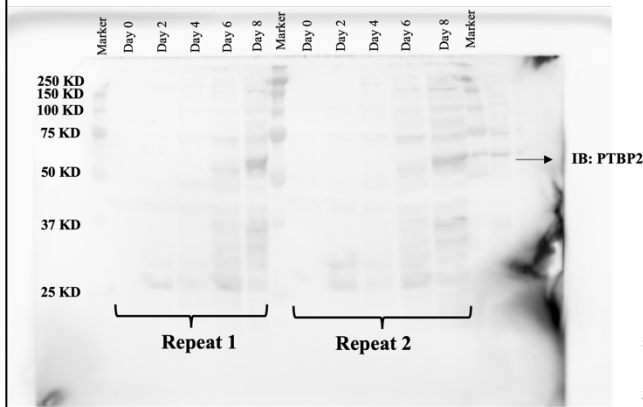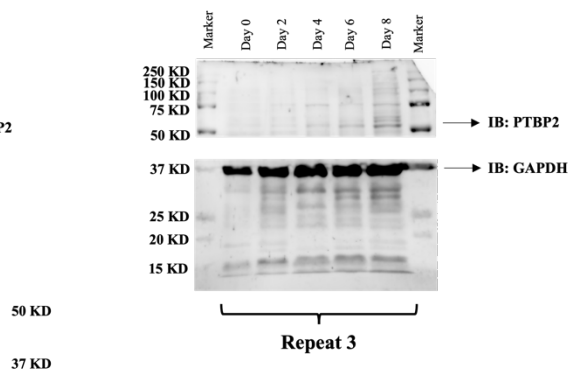

Supplementary Figure S8B

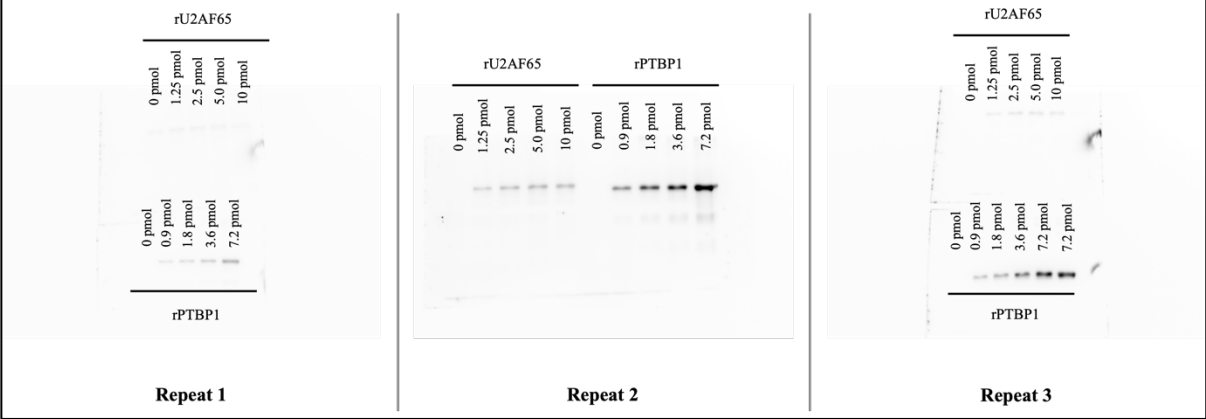

Supplementary Figure S8C

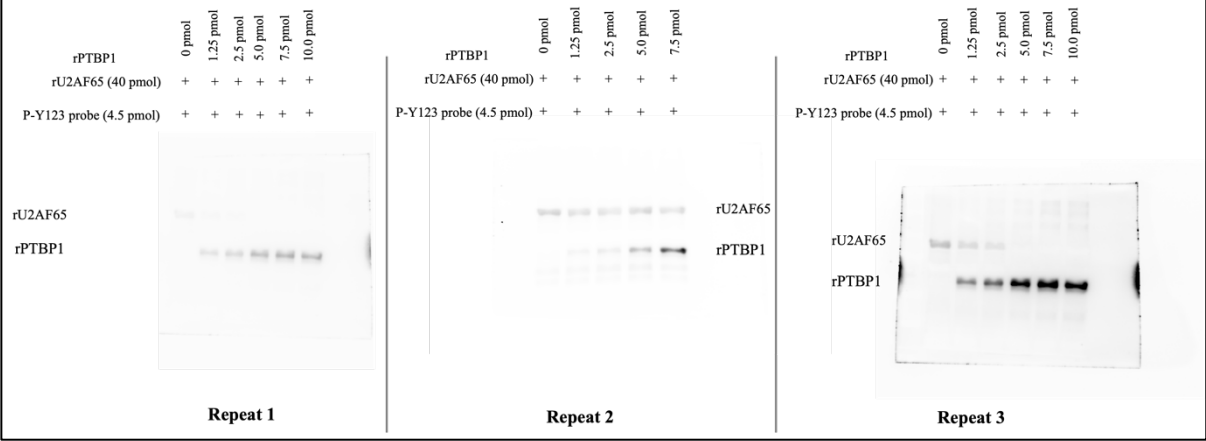

Supplement: s1 [file s1]
