# Supplementary material for: Call 513-662-7000 For Service On Your Insurance
Source: MDPI journal article supplement (doi:10.3390/ijms24087420), 2009-01-01
Supplement: s1 [file s1]

Supplementary Figure S6

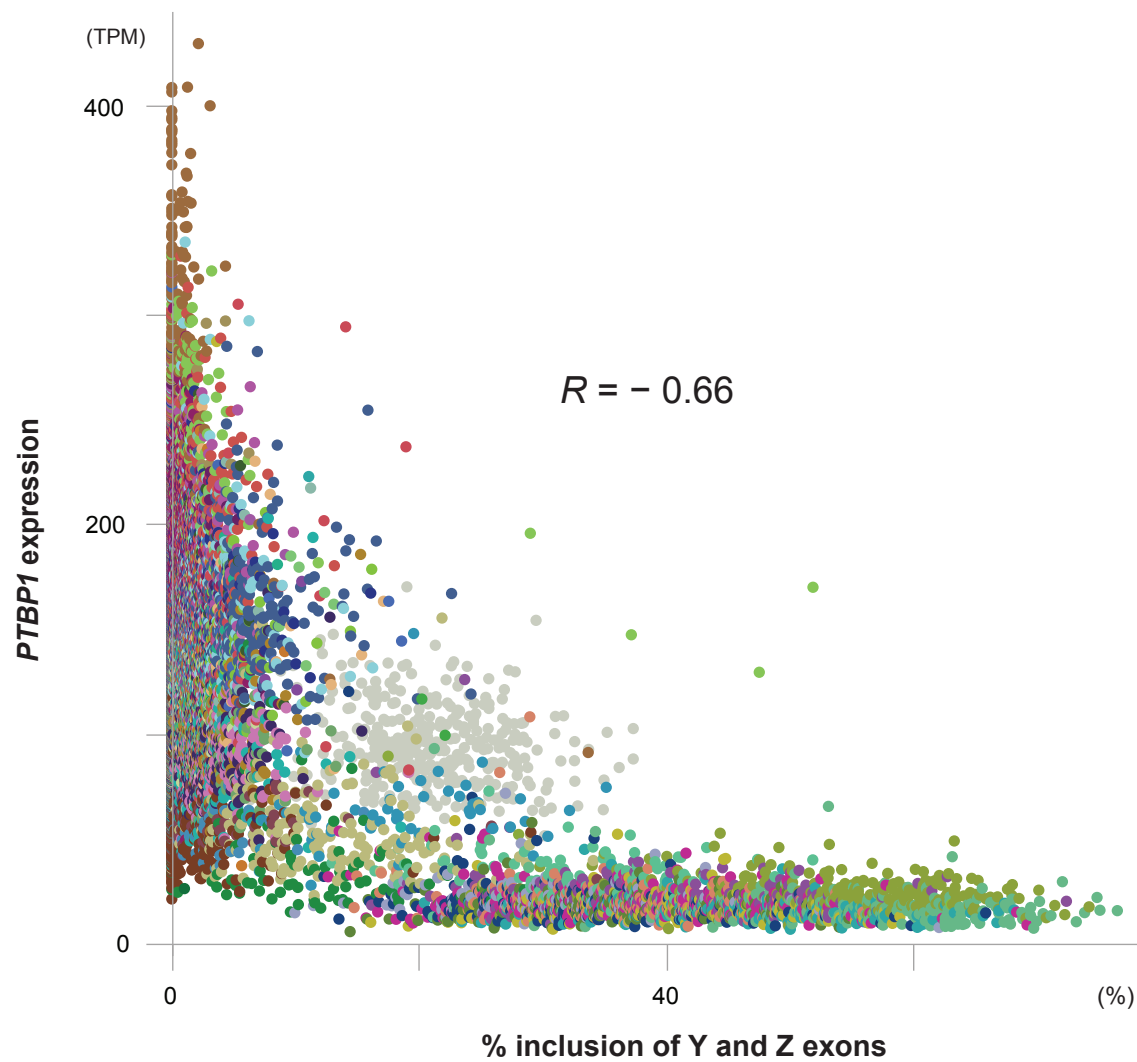

- |                                             |                                         |                                       |
|---------------------------------------------|-----------------------------------------|---------------------------------------|
| ● Adipose – Subcutaneous                    | ● Breast – Mammary Tissue               | ● Ovary                               |
| ● Adipose – Visceral (Omentum)              | ● Cells – Cultured fibroblasts          | ● Pancreas                            |
| ● Adrenal Gland                             | ● Cells – EBV-transformed lymphocytes   | ● Pituitary                           |
| ● Artery – Aorta                            | ● Cervix – Ectocervix                   | ● Prostate                            |
| ● Artery – Coronary                         | ● Cervix – Endocervix                   | ● Skin – Not Sun Exposed (Suprapubic) |
| ● Artery – Tibial                           | ● Colon – Sigmoid                       | ● Skin – Sun Exposed (Lower leg)      |
| ● Bladder                                   | ● Colon – Transverse                    | ● Small Intestine – Terminal Ileum    |
| ● Brain – Amygdala                          | ● Esophagus – Gastroesophageal Junction | ● Spleen                              |
| ● Brain – Anterior cingulate cortex (BA24)  | ● Esophagus – Mucosa                    | ● Stomach                             |
| ● Brain – Caudate (basal ganglia)           | ● Esophagus – Muscularis                | ● Testis                              |
| ● Brain – Cerebellar Hemisphere             | ● Fallopian Tube                        | ● Thyroid                             |
| ● Brain – Cerebellum                        | ● Heart – Atrial Appendage              | ● Uterus                              |
| ● Brain – Cortex                            | ● Heart – Left Ventricle                | ● Vagina                              |
| ● Brain – Frontal Cortex (BA9)              | ● Kidney – Cortex                       | ● Whole Blood                         |
| ● Brain – Hippocampus                       | ● Kidney – Medulla                      |                                       |
| ● Brain – Hypothalamus                      | ● Liver                                 |                                       |
| ● Brain – Nucleus accumbens (basal ganglia) | ● Lung                                  |                                       |
| ● Brain – Putamen (basal ganglia)           | ● Minor Salivary Gland                  |                                       |
| ● Brain – Spinal cord (cervical c-1)        | ● Muscle – Skeletal                     |                                       |
| ● Brain – Substantia nigra                  | ● Nerve – Tibial                        |                                       |
