# Supplementary material for: Call 513-662-7000 For Service On Your Insurance
Source: MDPI journal article supplement (doi:10.3390/ijms24087420), 2009-01-01
Supplement: s1 [file s1]

# Supplementary Figure S3

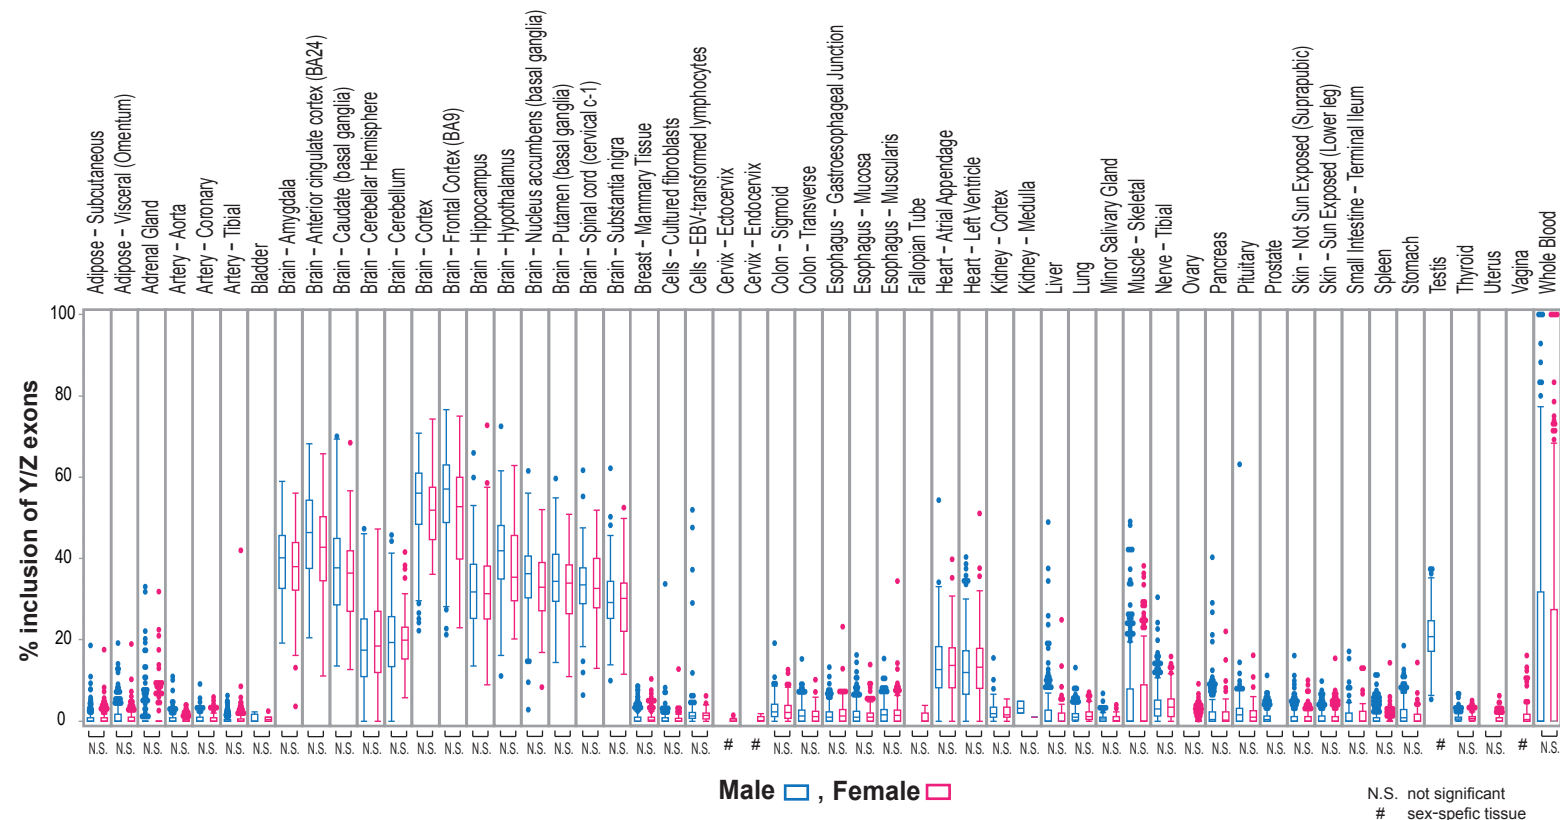

No significant sex difference in the level of Y/Z exon inclusion in any tissue
