# Supplementary figures and images for: Call 513-662-7000 For Service On Your Insurance
Source: MDPI journal article supplement (doi:10.3390/ijms24087420), 2009-01-01

Supplementary Figure S1

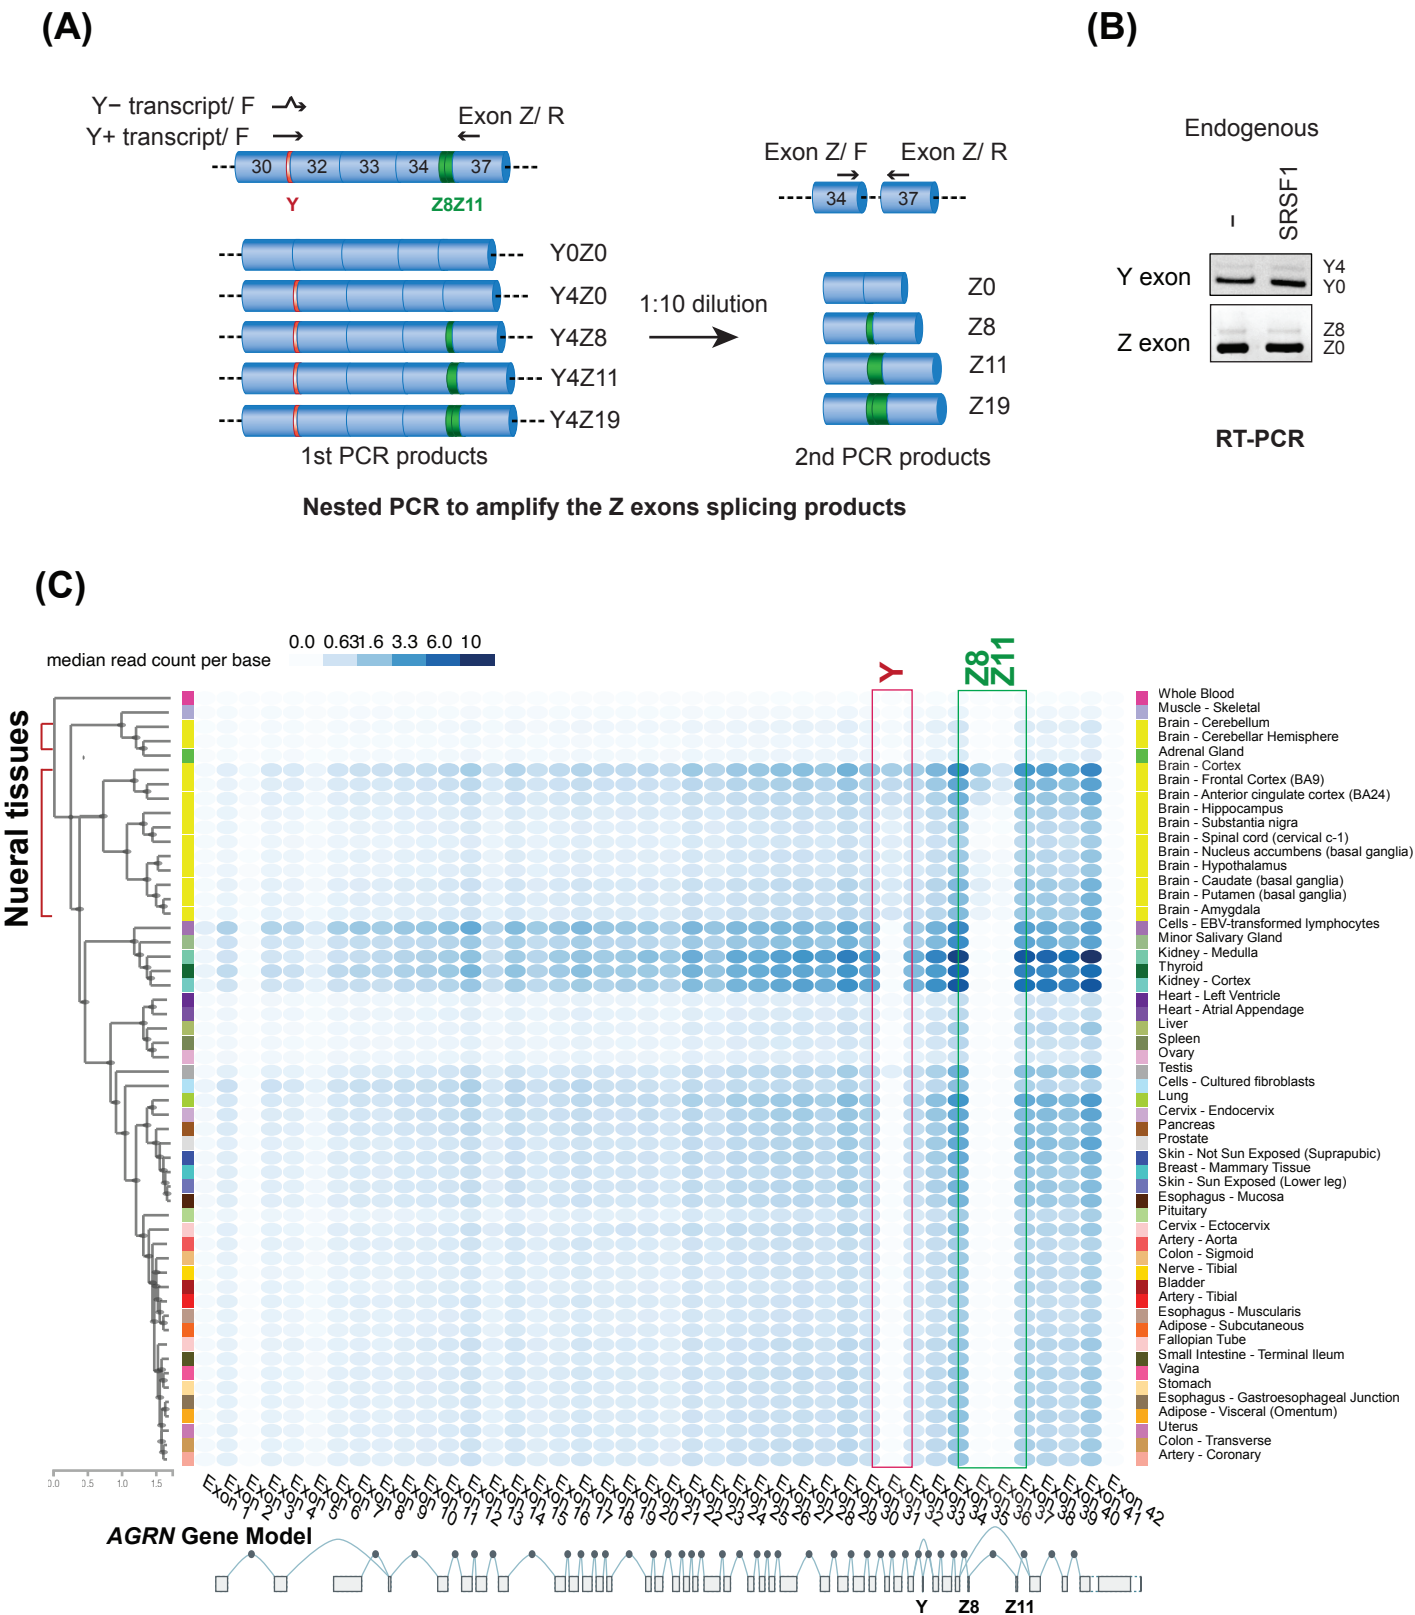

Supplement: s1 [file s1]

Supplementary Figure S11

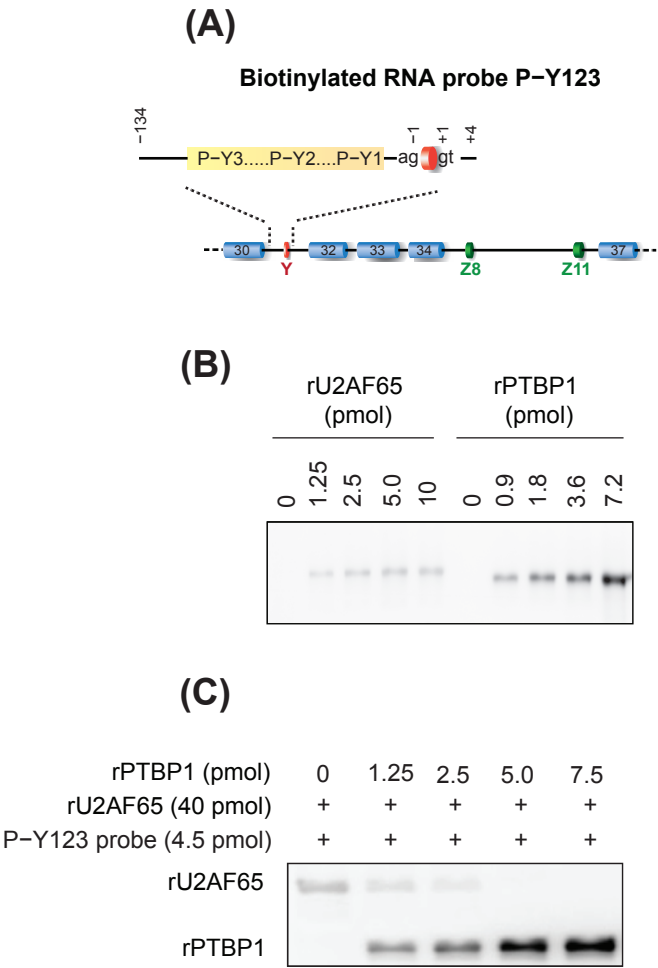

Supplement: s1 [file s1]

Supplementary Figure S10

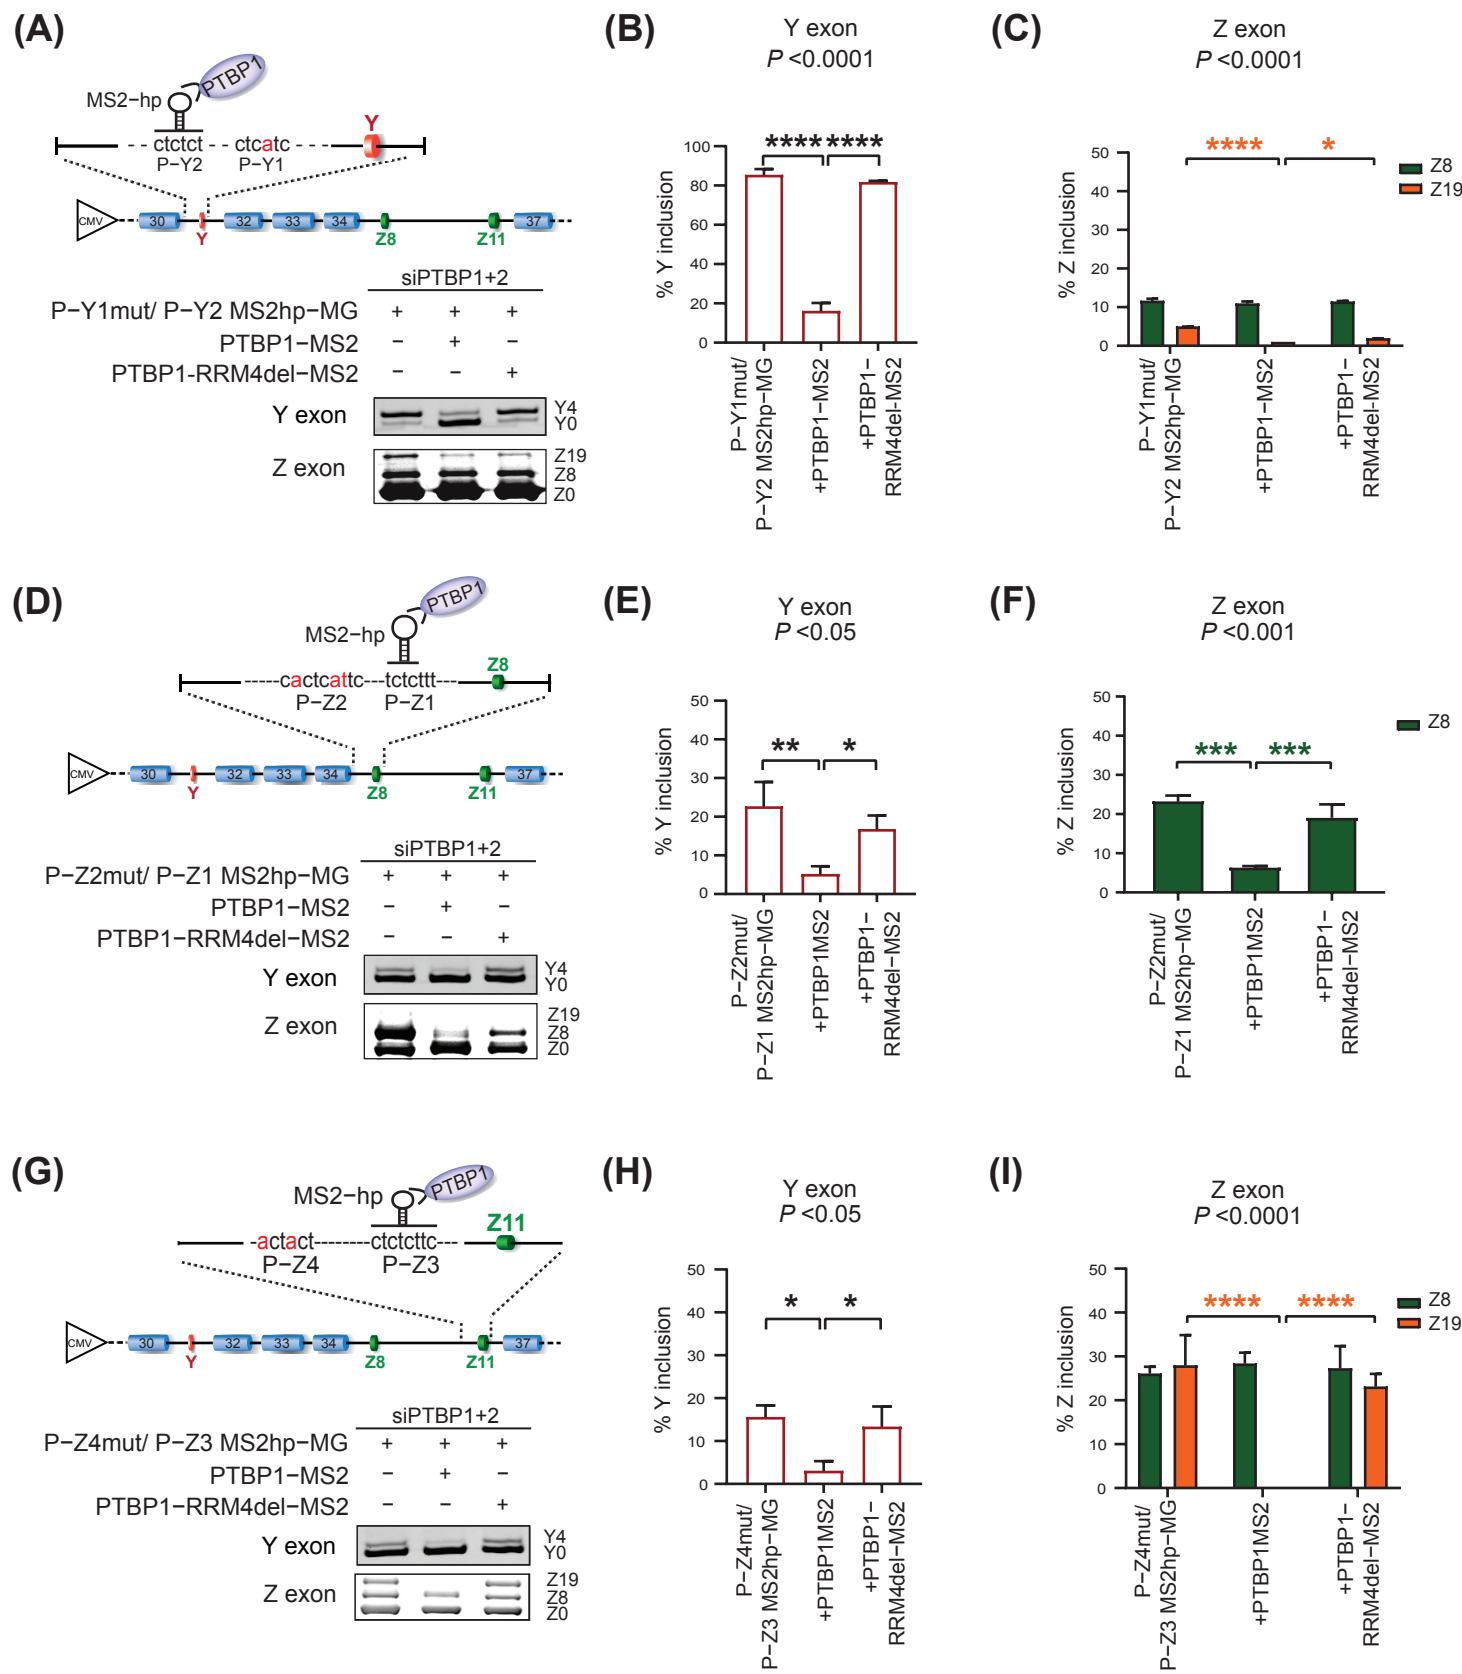

Supplement: s1 [file s1]

Supplementary Figure S7

(A)

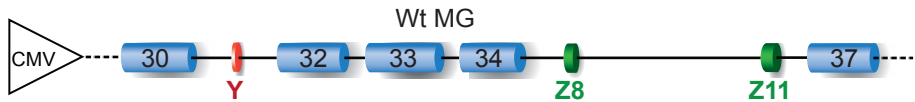

(B)

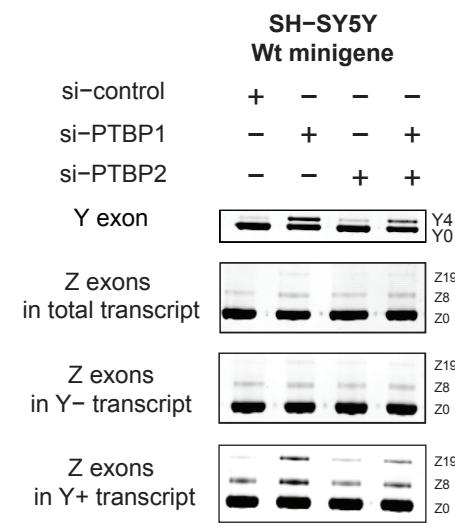

(C)

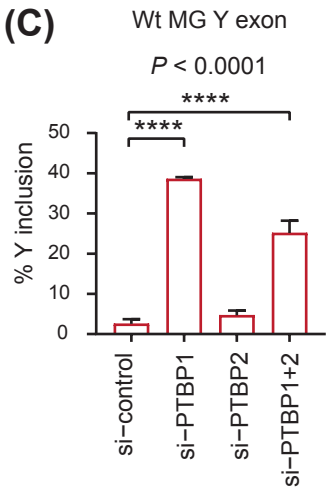

(D)

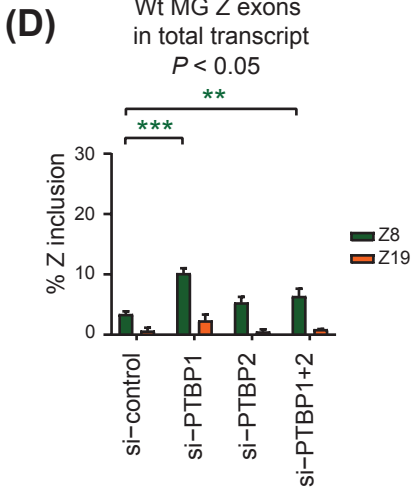

(E)

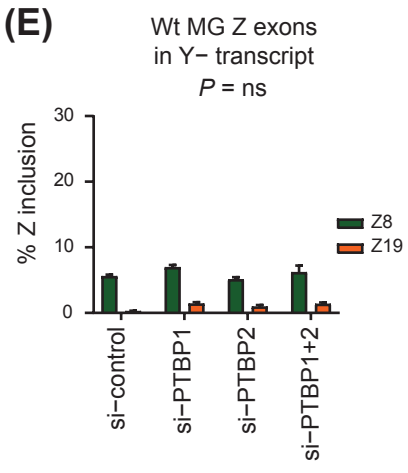

(F)

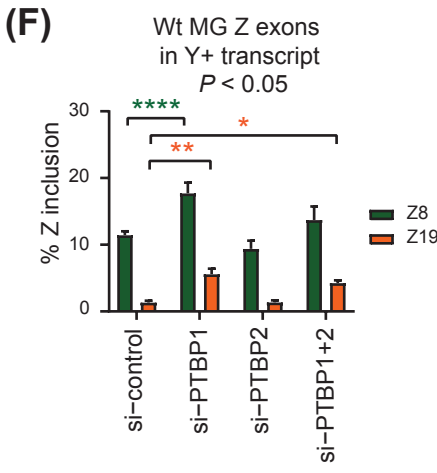

Supplement: s1 [file s1]

Supplementary Figure S9

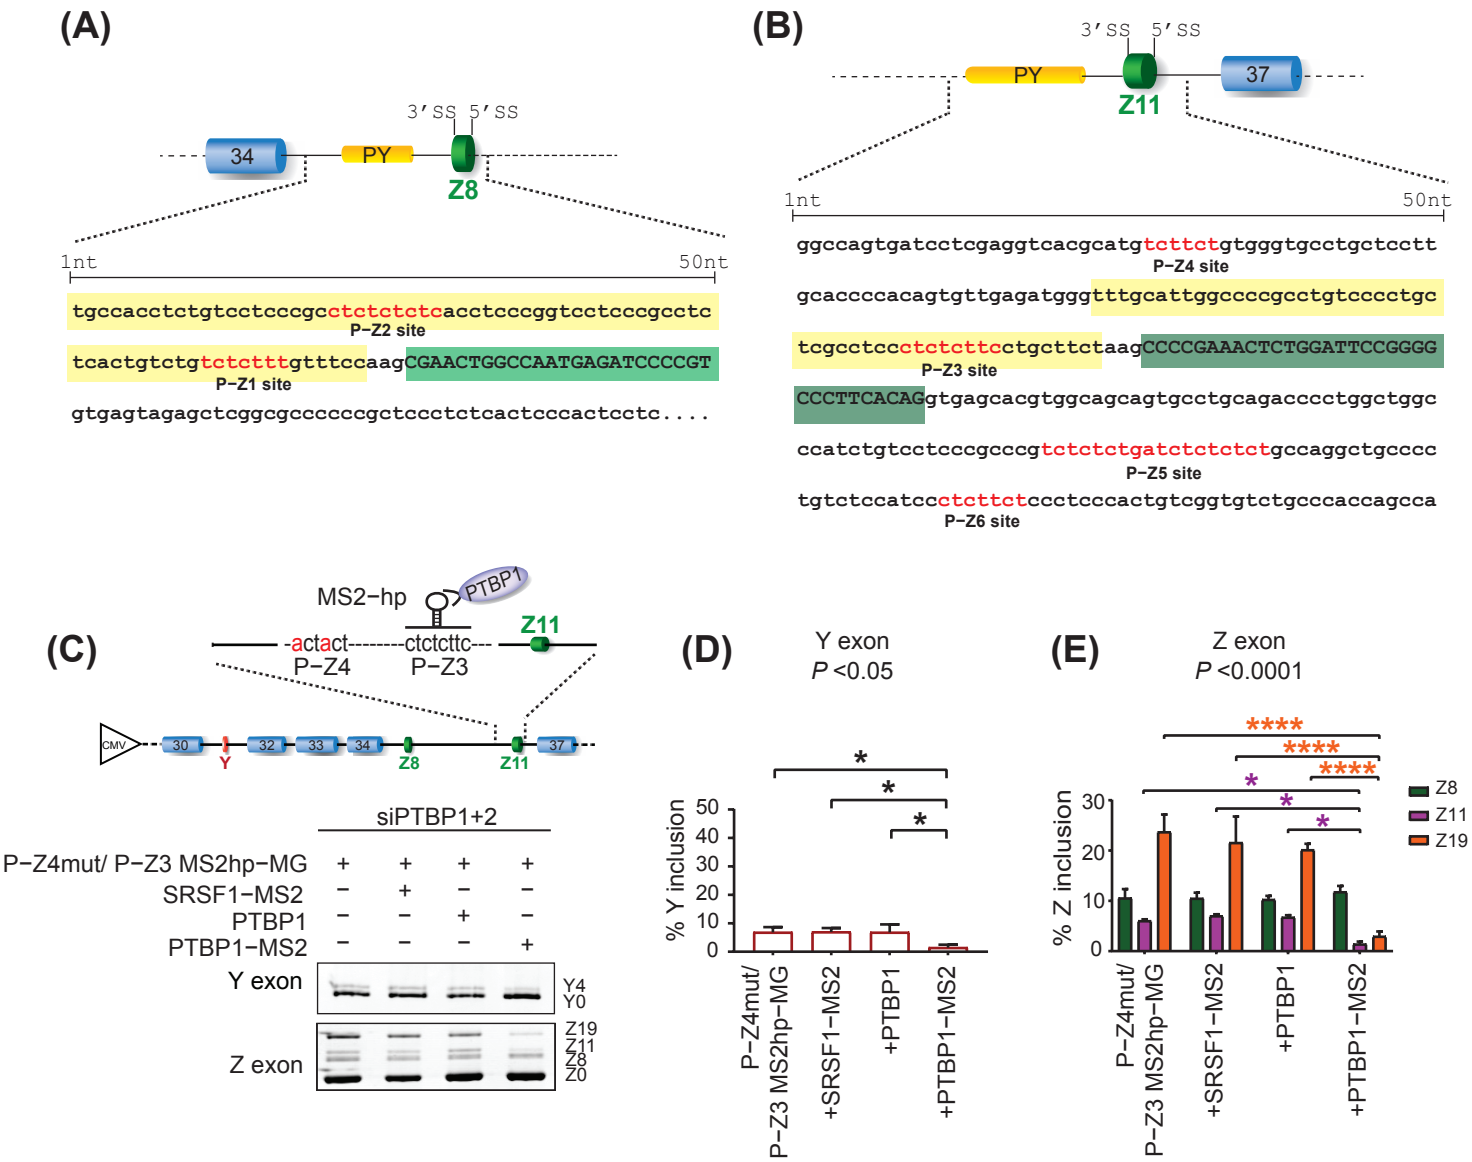

Supplement: s1 [file s1]

Supplementary Figure S4

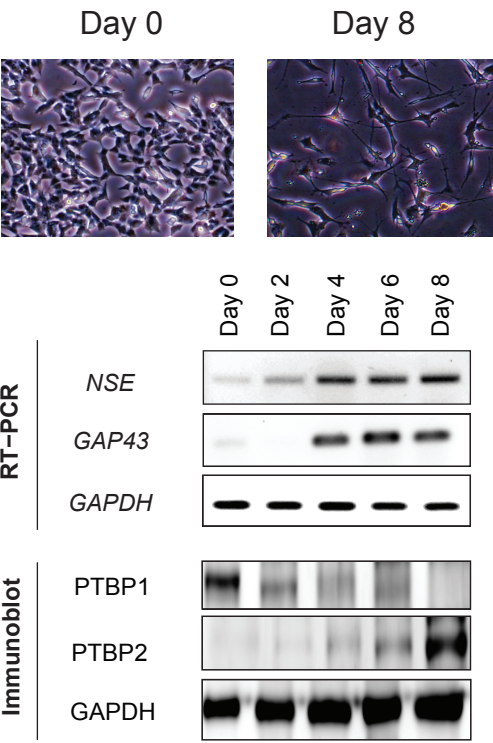

Supplement: s1 [file s1]

## Supplementary Figure S8

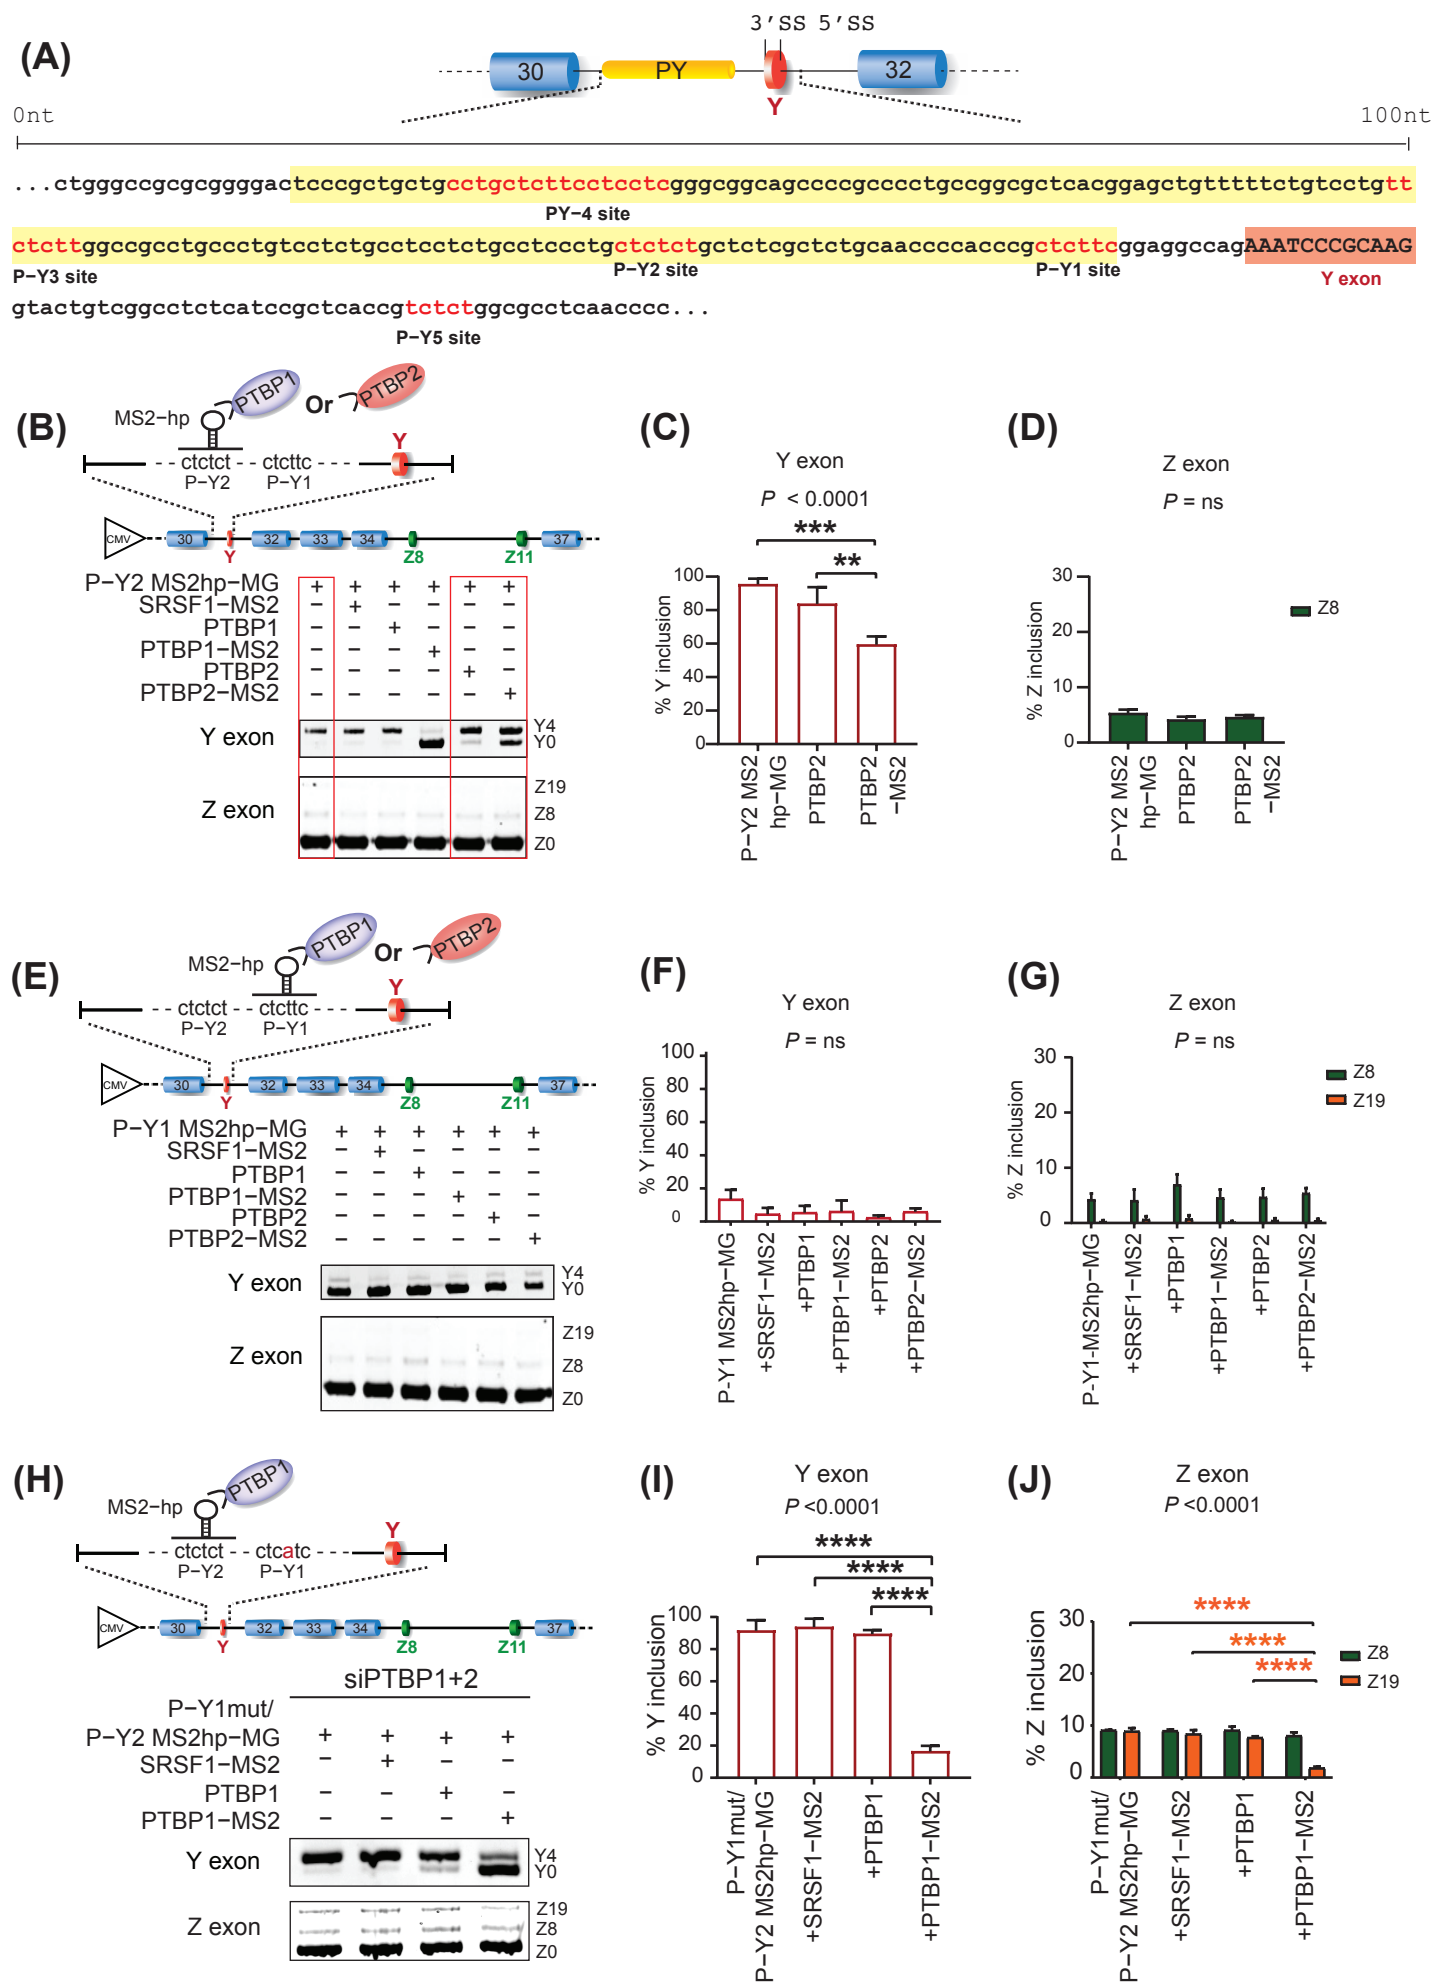

Supplement: s1 [file s1]

Supplementary Figure S5

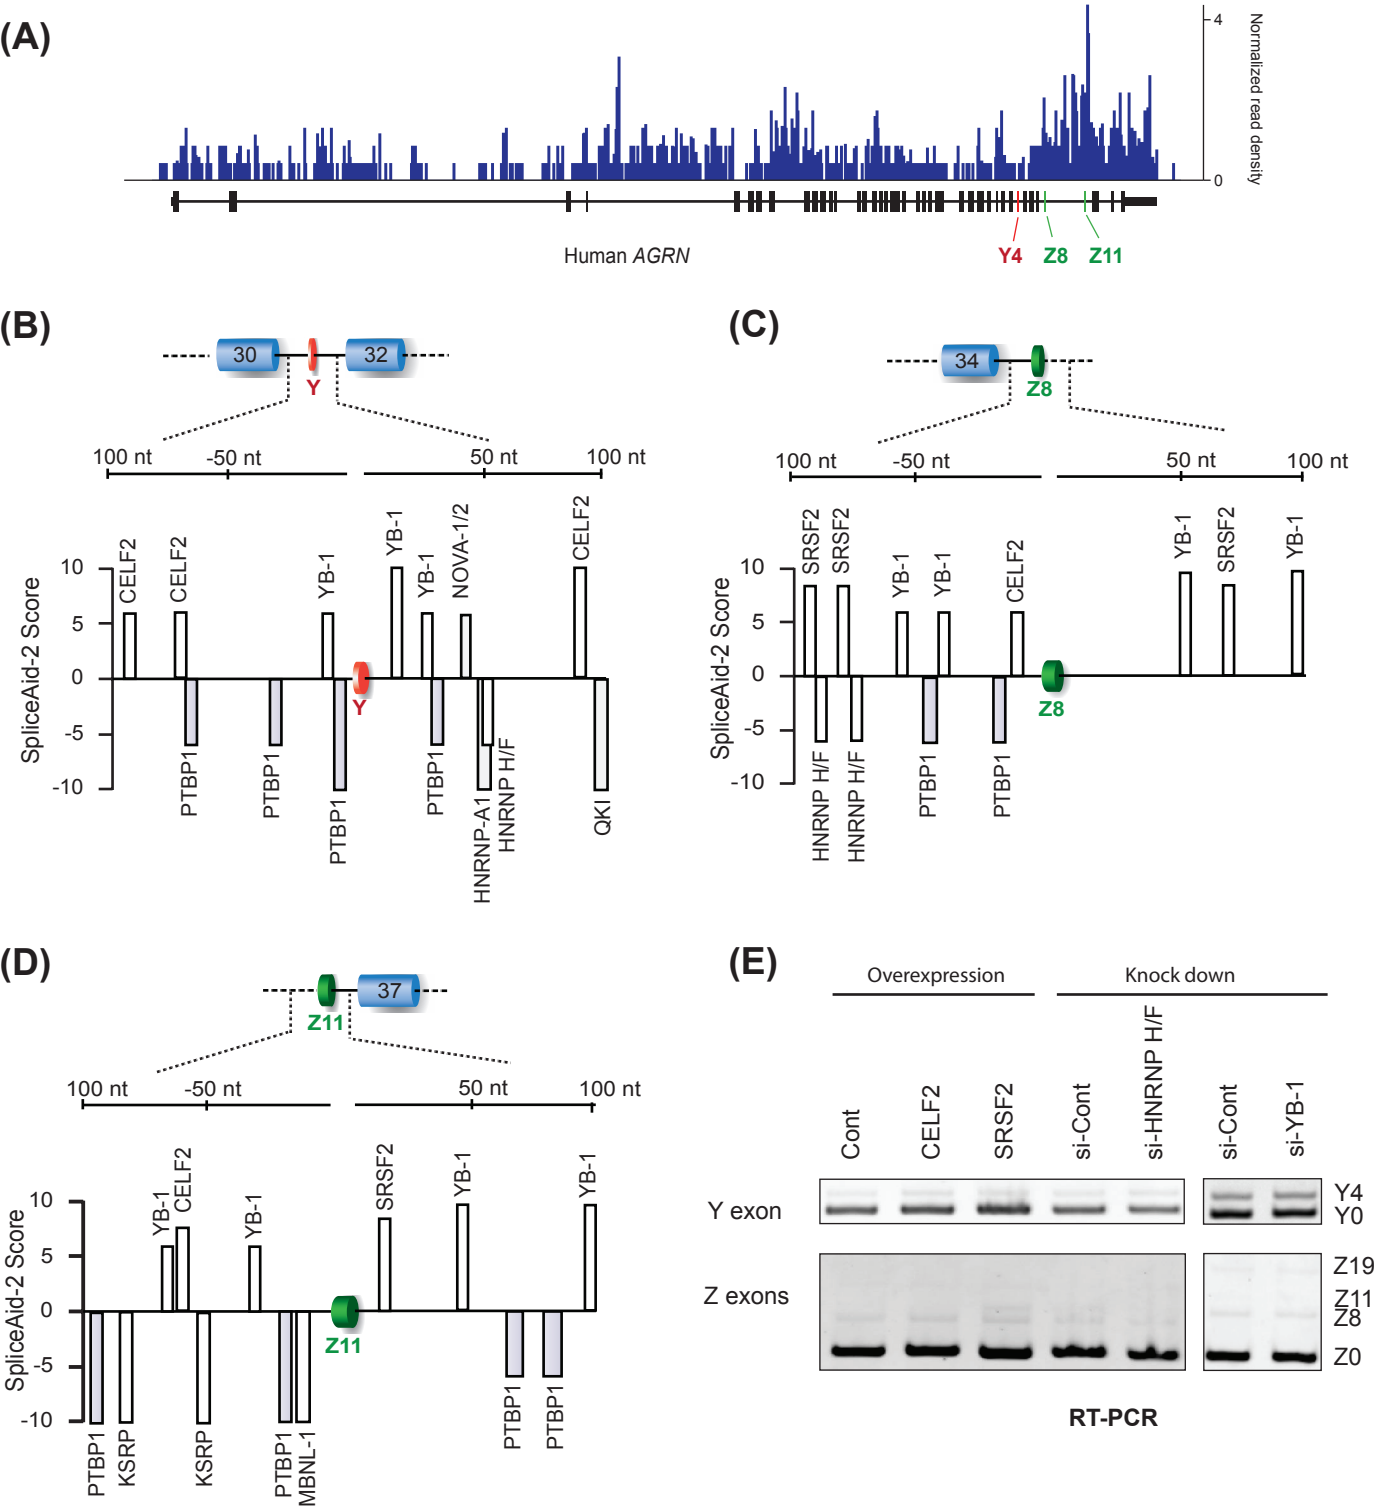

Supplement: s1 [file s1]
